# Supplementary material
Source: PubMed Central journal article supplement (PMC6003885)
Supplement: NIHMS972274-supplement-1.pdf [file NIHMS972274-supplement-1.pdf]

**Table S1. Refinement statistics. Related to Figure 1.**

|                                                     | NusG-NGN-<br><i>opsEC</i> | RfaH-NGN-<br><i>opsEC</i> | RfaH- <i>opsEC</i> |
|-----------------------------------------------------|---------------------------|---------------------------|--------------------|
| <b>Data Collection and processing</b>               |                           |                           |                    |
| Microscope                                          | FEI Titan Krios           | FEI Titan Krios           | FEI Titan Krios    |
| Voltage (kV)                                        | 300                       | 300                       | 300                |
| Detector                                            | K2 summit                 | K2 summit                 | K2 summit          |
| Electron exposure (e <sup>-</sup> /Å <sup>2</sup> ) | 69.9                      | 71.0                      | 71.0               |
| Defocus range (μm)                                  | 0.8 – 2.5                 | 0.8 – 2.4                 | 0.8 – 2.4          |
| Data Collection mode                                | Counting                  | Super-resolution          | Super-resolution   |
| Physical pixel size (Å/pixel)                       | 1.07                      | 1.3                       | 1.3                |
| Symmetry imposed                                    | C1                        | C1                        | C1                 |
| Initial particle images (No.)                       | 514,900                   | 389,200                   | 389,200            |
| Final particle images (No.)                         | 171,900                   | 174,600                   | 107,500            |
| Map resolution (Å) <sup>a</sup>                     | 3.72                      | 3.54                      | 3.70               |
| <b>Refinement</b>                                   |                           |                           |                    |
| Map sharpening B factor (Å <sup>2</sup> )           | - 99.9                    | - 77.9                    | - 69.7             |
| <b>RMSD</b>                                         |                           |                           |                    |
| Bond lengths (Å)                                    | 0.08                      | 0.01                      | 0.01               |
| Bond angles (°)                                     | 1.02                      | 1.11                      | 1.04               |
| <b>Ramachandran<sup>b</sup></b>                     |                           |                           |                    |
| Favored (%)                                         | 82.2                      | 85.7                      | 82.7               |
| Allowed (%)                                         | 17.5                      | 14.0                      | 17.1               |
| Generously Allowed (%)                              | 0.3                       | 0.3                       | 0.2                |
| Disallowed (%)                                      | 0                         | 0                         | 0                  |
| <b>Molprobit<sup>c</sup></b>                        |                           |                           |                    |
| Clash score                                         | 5.18                      | 7.63                      | 6.43               |
| Rotamer outliers (%)                                | 0.29                      | 0.72                      | 0.35               |
| Overall score                                       | 1.76                      | 1.92                      | 1.86               |

<sup>a</sup> Gold-standard FSC 0.143 cutoff criteria, as calculated by RELION (Figure S2D) (Scheres, 2012).

<sup>b</sup> Procheck (Laskowski et al., 1993).

<sup>c</sup> (Chen et al., 2010)

**Table S2. Conformational changes of NusG-opsEC and RfaH-opsEC compared to X-EC (6ALF). Related to Figure 1.**

| Structural module | residues                                                                                                          | PyMOL command        | Rmsd (Å), # of C $\alpha$ 's |                |                |
|-------------------|-------------------------------------------------------------------------------------------------------------------|----------------------|------------------------------|----------------|----------------|
|                   |                                                                                                                   |                      | vs. EC (6ALH)                | vs. NusG-opsEC | vs. RfaH-opsEC |
| Entire structure  | $\alpha$ I: 7-158; 167-234<br>$\alpha$ II: 4-159; 169-232                                                         | align                | 0.562 (2,923)                | 0.641 (2,666)  | 0.591 (2,732)  |
|                   | $\beta$ : 3-890; 913-1,341<br>$\beta$ ': 16-933; 946-1,126; 1,135-1,373<br>$\omega$ : 2-74                        | rms_cur <sup>a</sup> | 0.701 (3,162)                | 1.071 (3,159)  | 0.836 (3,162)  |
| Core module       | $\alpha$ I: 7-158; 167-234<br>$\alpha$ II: 4-159; 169-232                                                         | align                | 0.488 (1,305)                | 0.446 (1,274)  | 0.412 (1,285)  |
|                   | $\beta$ : 3-30; 140-150; 445-455; 513-713; 786-832; 1,056-1,318<br>$\beta$ ': 343-368; 421-786<br>$\omega$ : 2-74 | rms_cur <sup>a</sup> | 0.567 (1,369)                | 0.550 (1,366)  | 0.508 (1,369)  |

<sup>a</sup> Structures were superimposed over the core module using the PyMOL align command prior to the rms\_cur command.
